# Supplementary material for: Statistical Analysis of Wave Energy Resources Available for Conversion at Natural Caves of Cape-Verde Islands
Source: Copernicus journal article supplement (doi:10.5194/os-2015-108), 2016-01-20
Supplement: Supplementary file [file os-2015-108-AC1-supplement.pdf]

# 1 **Statistical Analysis of Wave Energy Resources Available** 2 **for Conversion at Natural Caves of Cape-Verde Islands.**

3  
4 **W. M.L. Monteiro<sup>1</sup> A. J. Sarmiento<sup>2</sup>, A.J. Fernandes<sup>1</sup>and J.M. Fernandes<sup>1</sup>**

5 [1]{Department of Science and Technology, University of Cape-Verde, Praia, Cape-Verde}

6 [2]{Lisbon High Technical Institute, Technical University of Lisbon, Lisbon, Portugal}

7 Correspondence to: W. M.L. Monteiro (wilson.monteiro@docente.unicv.edu.cv)

## 8 9 **Abstract**

10 Using the time-series of significant wave height and the peak period between 1979 and 2009,  
11 generated by SOWFIA - Streamlining of Ocean Wave Farm Impact Assessment, some  
12 relevant statistical information about energy content available in ocean waves in Cape-Verde  
13 is obtained. The monthly and inter-annual time-series of the average power are analysed and  
14 the confidence intervals for their values are defined. Considering all of the 31 years of data,  
15 the results show that the most energetic month, from the average power point of view is  
16 January (23.49 kW/m) and the least energetic month is July (15.04 kW/m). In fact, the  
17 monthly average power decays from January to July and increases from July to December  
18 (21.21 kW/m). The inter-annual average power for the 31 years of data exhibits a weak  
19 attenuation caused by data aggregation. However, using the moving average smoothing curve  
20 it is possible to note that, between 1999 and 2009, the values of this parameter seems to  
21 stabilize around 18 kW/m. Using the appropriate Autoregressive Integrated Moving Average  
22 (ARIMA) model we verified that the future values of the inter-annual average power tend to  
23 oscillate around the same level of average power (18 kW/m).The outliers present in time-  
24 series of annual average power were identified and their influence in the value of inter-annual  
25 average power was quantified. Removing outliers from the annual time-series of power  
26 caused a maximum relative attenuation in the values of the inter-annual average power  
27 between 1.85 and 13%. Through the Coefficient of Variation of Power (COVP), obtained by  
28 dividing the standard deviation of the power time-series by the average power, it is possible to

1 conclude that the wave resource is stable, with COVP between 0.46 and 0.66. The values of  
2 the Monthly Variation Index (MVI), the maximum range of the monthly mean wave power  
3 relative to the yearly mean level, show that the resource is relatively stable, with  $MVI < 1.2$ .  
4 The present work calculates the deep water power available for the Natural Caves (NCs) in  
5 Cape Verde Islands, through a rigorous analysis of the wave climate that excites them. The  
6 minimum sampling size and the corresponding numbers of days of measurements per month  
7 are also estimated. The results show that the number of days of measurements is lower in  
8 spring (March to May) and summer (June to August). This is due to the lower level dispersion  
9 of wave data for these seasons, in comparison with the rest of the months.

10

## 11 **1 Introduction**

12 Ocean waves constitute one of the renewable sources of energy that are gradually entering the  
13 market of clean and sustainable energy worldwide. The global theoretical energy from ocean  
14 wave is estimated in 17500 TWh/year (Boyle, 2004). Many countries around world have been  
15 investing on this natural resource to produce useful and sustainable energy. Portugal (Pelamis  
16 and Pico Plant Projects.), Australia (CETO and OCEANLIX projects), France (SEAREV  
17 project), UK (OYSTER WEC and Limpet projects) and Holland (AWS project) are examples  
18 of some of countries that have recognized the feasibility of harvesting this source of energy  
19 (ABP, 2004). According to the International Renewable Energy Agency (Monford et al.,  
20 2014), around 64 % of the Wave Energy Converters (WECs) has been projected for offshore  
21 application and 36% for near-shore and onshore operation. Some full-scale operational tests  
22 have been realized. These include the OYSTER device from Aquamarine Power, the Wave  
23 Roller from AW-Energy, Pelamis P2 from the Pelamis Wave Power, the Seabased and the  
24 Sea-Tricity devices. Magagna (2011) has identified, in 2011, over 100 wave energy  
25 developers. Yet, EMEC (2014) has listed 170 wave energy developers worldwide. About 45%  
26 of the wave energy developers are based in or are currently developing projects in the  
27 European Union (EU) regions. The global installed capacity of wave energy remains low and  
28 the technologies are still at an advanced R&D stage. Just a few machines have sustained long  
29 operational hours, such as the Aquamarine OYSTER (>20000 hours) and Pelamis (cumulative  
30 > 10000 hours) (Scottish Renewable, 2014). The growth of the wave energy sector is lower  
31 than expected and this fact may affect the confidence of investors in this area. Success in

1 attracting future Original Equipment Manufacturer investments will depend on the capacity of  
2 the developers in improving performance, reducing cost and validating wave energy  
3 technologies. The long-term global wave energy is expected to become cost competitive and  
4 provide an alternative to other Renewable Energy Sources and conventional energy resources.  
5 Through a review of the existing data available, the different cost components in the Capital  
6 Expenditure (CAPEX) estimate for wave energy extraction have been identified as follows  
7 (Table 1):

8

9 Table1. Costs components estimate for wave energy extraction (JRC, 2014).

|                                                  |     |
|--------------------------------------------------|-----|
| Civil and Structural costs                       | 38% |
| Mechanical Equipment costs                       | 42% |
| Electrical and I&C supply and installation costs | 8%  |
| Project indirect cost                            | 7%  |
| Development cost                                 | 5%  |

10

11 Thus, the main components of CAPEX are mechanical equipment, civil and structural costs.  
12 In this context, the developers of wave energy technologies must undertake efforts and  
13 strategies aimed at reducing the two above mentioned costs and the risks associated with the  
14 operation of these equipment out-shore or close to shore.

### 15 **1.1 Natural Caves**

16 Natural Caves (NC) are caverns formed naturally under the rocky shorelines, inside of which  
17 there is an air layer (Fig.1). This air layer acts like an air pump against the cave ceiling, as the  
18 wave enters and exits these natural infrastructures, forcing the compressed air to go in and out  
19 of the NC, through surface holes at the top of the cave. Fig. 2 shows NCs with one and two  
20 holes.

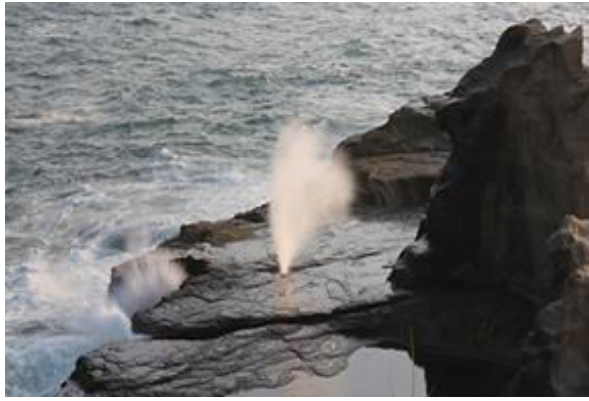

Figure 1. Activity in a Natural Cave.

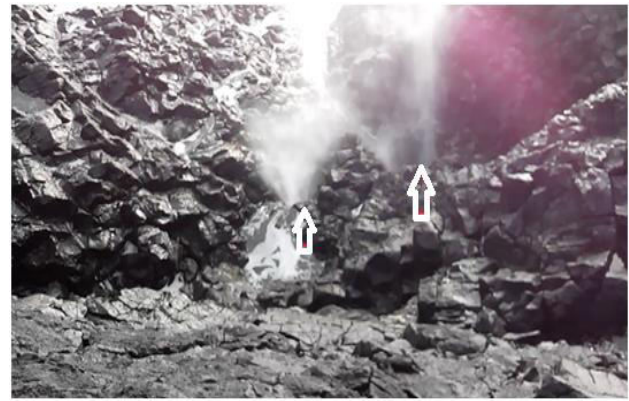

Figure 2. Activity in a NCs with two holes.

- 1 The principles of NCs operations are similar to the man-made Oscillating Water Column
- 2 device, projected for onshore application.
- 3 Justification for using the NCs for wave energy conversion is a possible cost reduction on the
- 4 Civil and Structural cost components, which, as mentioned before, are the most significant
- 5 costs associated with building wave energy devices to produce electricity. Furthermore, the
- 6 risk of the device collapsing is minimized, by taking advantage of the sturdiness of the natural
- 7 rocky structure, time tested by the waves and storms.
- 8 To evaluate the potential of NCs for electricity production, it is necessary to estimate its
- 9 output power. To do this, a set of experiments aimed at determining the values of some
- 10 important physics parameters of NCs operations need to be conducted. Monteiro and
- 11 Sarmiento (2015) carried out the analytical modelling of the NCs operations as a function of
- 12 their functioning physical parameters. The present study is part of a deeper work aimed at
- 13 quantifying the output power of NCs and to project an adequate power take-off system to be
- 14 adapted on their holes, for energy extraction.
- 15 Since the excitation waves are irregular, non-linear and non-stationary phenomenon it is very
- 16 important to determine beforehand the sampling size, i.e. how long it takes to carry out the
- 17 experiments (number of days of measurements) on a NCs, in order to guarantee the time
- 18 representativeness of its output power. To achieve this goal, some statistical analysis has to be
- 19 carried on the wave energy input regime.

## 1 **1.2 Wave Energy in Cape-Verde: the state of the art**

2 Cape-Verde is an archipelago of ten islands in the Atlantic Ocean, off the West Coast of  
3 Africa, with roughly half million people. The country is totally dependent on oil to produce  
4 electricity, having one of the most expensive cost of electricity in Africa, around 0.28  
5 Euro/kWh (Electra, 2012) versus 0.17 Euro/kWh (Senelec, 2015) at Senegal, a continental  
6 neighbour. Some investments were made by the Government of Cape-Verde aimed to  
7 introducing renewable sources of energy in the country, mainly solar and wind energy. The  
8 Renewable Energy Plan for Cape-Verde (ERPCV) has defined an ambitious goal of  
9 achieving 50% of Renewable Energy penetration in the country by 2020 (GESTO, 2011). As  
10 a results of the ERPCV, there are in the country four wind energy farms with a total annual  
11 production between 80 and 110 GWh and two solar energy farms with 7.5 MWp (MWp-  
12 Mega Watt Peak) (GESTO, 2011). In 1999, some research projects on ocean energy were  
13 initiated in the country, directed at Ocean Thermal Energy Conversion (OTEC) system and  
14 WaveStar technology (Wave energy). Unfortunately, these projects did not produced any  
15 visible results since they lacked a institutional framework on which to develop.

16 Because of its insular nature, most of Cape-Verde's economic activities (around 90%) are  
17 concentrated on coastal areas (Carvalho, 2013). In this context, it makes sense to use wave  
18 energy for producing electricity locally. A clear alternative is harvesting the energy from  
19 ocean waves. The evaluation of the wave energy resources and the feasibility study associated  
20 with its utilization in Cape-Verde need to be assessed in more detail. Before 2009, some pilot  
21 projects for wave energy conversion at southern of Santiago Island were conceived but never  
22 implemented and worst yet, never went beyond pre-feasibility studies (DGE, 2009). In 2009  
23 an attempt was made to deploy the WaveStar device, developed by Danish company  
24 WaveStar Energy, at Sal Island. This project forecasted the wave energy resources in some  
25 regions around the Island, using measurements gathered by a wave buoy installed in place.  
26 Unfortunately, the project failed to achieve its goals and the buoy was abandoned at the  
27 Instituto de Meteorologia e Geofisica de Cabo-Verde, in Sal Island (DGE, 2009). In 2011,  
28 GESTO Energy, a Portuguese company, carried out an evaluation of the wave resources in  
29 Cape-Verde based on eleven years of data produced by meteorological wave model  
30 worldwide. The data of direction, period and significant wave height were characterized and  
31 the values of these parameters were used for calculate the offshore annual average wave

1 power (GESTO, 2011). According to this study, the islands that present the best potential for  
2 wave energy exploration are Sal, S. Antão, S. Vicente and Boa Vista. In fact, four projects for  
3 offshore wave energy conversion based on the Pelamis technology were proposed for these  
4 islands (GESTO, 2011): Sal (3.7 MW), S. Antão (3.7 MW), S.Vicente (3.7 MW) and  
5 Boavista (3.5MW). The study was commissioned by the Ministry of Turism, Industry and  
6 Energy of Cape-Verde and, unfortunately, the scientific results of the study are unknown  
7 since it was never published in any scientific journal or conference proceedings.

8 As there are no scientific data available on wave energy resources for Cape Verde Islands, the  
9 present work brings to light the real potential for wave energy harvesting and constitutes a  
10 significant contribution to authorities on which to base any decision about forthcoming  
11 investments on wave energy conversion. However, more detailed information will be needed  
12 in order to accurately validate the result of this study, as will be shown in next section.

13

## 14 **2 Data**

15 Knowledge of wave energy resource at a certain location is required by developers of Wave  
16 Energy Converters projects in order to allow them to select the most favourable sites for  
17 achieving optimal power capture and economic performance from their devices. Three main  
18 categories of data are available for wave energy resources assessment: In-situ measurements  
19 (buoy, pressure transducers, wave staff, ship-borne wave recorders), remote sensing (satellite  
20 radar Altimetry RA, Synthetic Aperture Radar SAR, Marine Wave Radar), numerical models  
21 for deep-water (WAM and WaveWatch 3) and for shallow-water (SWAN, TOMAWAC and  
22 MIKE21).

23 SOWFIA-Streamlining of Ocean Wave Farm Impact Assessment is an EU Intelligent Energy  
24 Europe Project with the goal of sharing and consolidating pan-European experience and best  
25 practices for consenting processes and environmental and socio-economic impact assessment  
26 (IA) for offshore wave energy conversion developments (Mora-Figueroa et al., 2011). This  
27 project brings together ten partners across eight EU Member States actively involved in  
28 planned wave farm test centres and aims at providing recommendations for streamlining of IA  
29 approval processes with the purpose of removing legal, environmental and socio-economic  
30 barriers associated with development of the wave energy farms. The SOWFIA project uses

1 data obtained from direct measurements (wave buoy) of the wave climate, carried out at the  
2 seven European wave energy test centres, through the Data Management Platform (DMP)  
3 tool. DMP is an interactive tool designed to assist in the decision making process, providing  
4 information on different wave energy monitoring activities at different test centres and  
5 allowing direct visualization and downloading of relevant data. The DMP is publically  
6 available on the SOWFIA website. The seven European test centres involved in the SOWFIA  
7 project are the AMETTS (Ireland), BIMEP (Spain), Lysekil (Sweden), Ocean Plug (Portugal),  
8 SEAREV (France), Wave Hub (United Kingdom) and EMEC (Scotland) (Mora-Figueroa et  
9 al., 2011).

10 For others regions of the ocean, where there are no in situ data measurements, the SOWFIA  
11 project uses data produced by WaveWatch 3 (WW3) wave model. The WW3 is phase-  
12 average model that solves the spectral action density balance equation for wavenumber-  
13 direction spectra. The Governing equation includes refraction due to the temporal and spatial  
14 variation of the mean water depth and current. The source terms include nonlinear  
15 interactions, dissipation due to the white capping, bottom friction, wind wave growth and  
16 decay (Tolman, 1999). An important constraint of the formulation of the WW3 is that the  
17 parameterizations of the physical process included in the model do not address conditions  
18 where the waves are strongly depth-limited. This constraint implies that the model is  
19 generally applied on spatial scales between 20 and 100 km outside of surf zone (Tolman,  
20 1999).

21 Like other sources of renewable energy, the nature of ocean waves is complex and impossible  
22 to be predicted precisely. The data produced by WW3 model must be, wherever possible,  
23 calibrated with in situ measurements using wave buoy or altimeter data. Both calibrations of  
24 the wave data and the estimation of the confidence bounds are made difficult by the complex  
25 structure of errors in the model data. Error in parameters from wave model show nonlinear  
26 dependence of variety of factors, seasonal and inter-annual changes in bias and short-term  
27 temporal correlation (Mackay et al., 2010). To assess the uncertainty associated with the  
28 estimation of energy yield from a wave energy converter (WEC), Mackay et al (2010) use two  
29 hindcasts from European Marine Energy Centre in Orkney. These hindcasts are produced by  
30 WAM (Komen et al., 1994) and WW3 wave models and calibrated using a Datawell  
31 Directional Waverider buoy moored in 50 m water depth at the EMEC site. The study show

1 that before wave data calibration, the estimation of the long-term mean WEC power from the  
2 two hindcasts differ by around 20%. After calibration this difference is reduced to 5%.

3 Data produced by WW3 through the SOWFIA project is used to evaluate the wave energy  
4 resources at Cape-Verde. The data was gathered for period between 1979 and 2009, at  
5 coordinates 16°N-24°W, approximately at centre of the archipelago, where the water depth is  
6 around 3.7 km (NOAA, 2015). The WW3 produced information about the significant wave  
7 height ( $H_s$ ), peak period ( $T_p$ ), peak direction ( $D_p$ ) and wind velocity, every 3 hours. The data  
8 generated by a wave model, should have been calibrated against data collected in situ, but  
9 unfortunately, there is no in-situ calibration buoy in the region. Another factor which  
10 introduces some inaccuracy in the data, is the shadow effect caused by the own presence of  
11 the islands. According to Ponce de León et al. (2010) the shadow effect is not taken into  
12 account in wave models and can introduce inaccuracy in wave data, especially at the location  
13 where the wave regime is characterized by low values of  $H_s$ . Another important aspect that  
14 deserves mentioning is the location of the Natural Caves (inshore) relative to the location of  
15 the data acquisition (offshore). Further study on the wave transformation from deep to  
16 shallow water must be carried out using information about the local bathymetry.  
17 Unfortunately, detailed bathymetric data is only available for some bays and harbours.  
18 Therefore, further approximations of coastal bathymetry must be made in order to obtain a  
19 more realistic result of wave energy resources available at shorelines regions.

20 The procedures and software available for mapping wave energy resources ignore, in general,  
21 some important statistical aspects that can lead to errors in wave energy assessment. The  
22 outliers that may be present in the time-series of wave data, as a result of a specific event such  
23 as extreme storms, could significantly influence the available average wave power. Yet, as the  
24 experimental study carried out by Mendes and Monteiro (2007) shows, some inshore WEC  
25 such as the OWC device, present serious handicaps when operating in high waves since these  
26 waves produce significant hydrodynamic loss associated with the interaction between waves  
27 and the caisson structure. Thus, the present study introduces a novelty by using adequate  
28 statistical tools to identify possible outliers in time-series of wave data, and the subsequent  
29 analyses of their influence in the inter-annual average power calculation. Another subject  
30 barely mentioned in papers, that can lead to error in the wave energy resources  
31 characterization are the effects of data aggregation. The information about the temporal



1 behaviour of the wave data are lost due to the aggregation effects. The present study shows  
 2 that the aggregation effects may be a real problem that deserves to be taken into account when  
 3 characterizing wave energy resources. Finally, based on the wave regime characteristics, this  
 4 paper calculates the time duration necessary to carry on the experiments at Natural Caves  
 5 aimed to quantify their output power with a minimum sample size that will guarantee its time  
 6 representativeness. The estimation of the time duration is very important as it helps evaluate  
 7 correctly the energetic performance of NCs. In fact, the statistical procedure presented in this  
 8 paper for quantifying the time duration can be followed by other researchers to better  
 9 understand the behaviour of their models of wave energy devices.

10

### 11 **3 Methodology**

12 Calculation of the wave energy input regime is carried out using principles and parameters  
 13 described below.

#### 14 **3.1 Average Power**

15 In deep water, where the depth is greater than a half of the wavelength, the average wave  
 16 power can be determined through the following equation, applied only for unidirectional  
 17 wave spectrum approximation.

$$18 \quad P = \frac{\rho g^2 H_s^2}{64\pi} T_e \quad (1)$$

19 Where,  $H_s$  is significant wave height,  $T_e$  is energy period, defined in terms of the spectral  
 20 momentum by the following relations:

$$21 \quad H_s = 4m_0^{1/2} \quad (2)$$

$$22 \quad T_e = \frac{m_{-1}}{m_0} = \frac{\int_0^{2\pi\infty} \int_0^{2\pi\infty} f^{-1} S(f) df d\theta}{\int_0^{2\pi\infty} \int_0^{2\pi\infty} S(f) df d\theta} \quad (3)$$

1 in which,  $m_{-1}$  is the spectral momentum of order -1,  $m_0$  is the spectral momentum of order 0,  
 2  $f$  is the frequency,  $S(f)$  is the spectral density function and  $\theta$  is the direction of the  
 3 energy propagation (Dean and Dalrymple, 1991).

4 The characterization of the wave climate is made by the combination of the significant wave  
 5 height  $H_s$  and peak period  $T_p$  or the zero-crossing period  $T_z$  parameters. The energy period  
 6 determined by the Eq.(3) require the knowledge of the form of energy spectrum. When the  
 7 form of the energy spectrum is unknown it can be approximated by any of the many model  
 8 available (Dean and Dalrymple, 1991). This is the approximation used on the elaboration of  
 9 the Marine Atlas of Renewable Resources in UK (ABP, 2004). Another approximation  
 10 commonly used for  $T_e$  is represented by  $T_e \approx \alpha T_p$ , where  $\alpha$  is an empirical parameter. The  
 11 approximation  $T_e = T_p$  used to evaluate the wave resource for Cape-Verde was considered, by  
 12 Hagerman (2001), very appropriate to make a preliminary analysis of wave energy resource.  
 13 Using the monthly series of the available power in waves it is possible to define the annual  
 14 time-series of this parameter through the following expressions:

$$15 \quad P_{aj} = \frac{\sum_{i=initial\ month}^{initial\ month +11} P_{ij}}{12} \quad (4)$$

16 In the above equation  $P_{aj}$  is the average power for year  $j$ ,  $P_{ij}$  is the average power for the  
 17 month and year. In this way, the monthly time-series begin on January and ends on December  
 18 of each year.

19 It is important to note that there is no physical justification for wave power to be monthly  
 20 periodic, but since the sun-cycle is the underlying cause for atmospheric pressure distribution  
 21 and wind patterns over the ocean, most likely it will be yearly periodic.

22 The reason to calculate monthly series of available power is just related to how data is  
 23 collected and made available at SOWFIA.

### 24 **3.2 Monthly Variation Index (MVI)**

25 The temporal variability of the wave resources is a key factor that affects decisively the  
 26 feasibility of wave energy projects. In this sense, the regions of the ocean where the resources

1 are stable are more attractive for any possible investors. Naturally, the level of the average  
 2 power is another important factor for viability of wave energy harvesting. The Monthly  
 3 Variation Index is defined as the ratio of the differences between the maximum and minimum  
 4 values of the monthly average wave power in year  $j$  by the corresponding annual average  
 5 wave power (Cornett, 2008). That is,

$$6 \quad MVI_j = \frac{(P_{\max} - P_{\min})_j}{P_{aj}} \quad (5)$$

7 where  $P_{\max}$  and  $P_{\min}$  are, respectively, the maximum and minimum values of the monthly  
 8 average power in year  $j$ .

### 9 **3.3 Coefficient of Variation of Power (COVP)**

10 COVP is another very important parameter used to evaluate the temporal variability of wave  
 11 resources. This quantity is defined by the ratio between the standard deviation of the wave  
 12 power and the respective annual average wave power in year  $j$  (Cornett, 2008).

$$13 \quad (COVP)_j = \frac{\sigma(P(t))_j}{P_{aj}} \quad (6)$$

14 In the Eq.(6),  $\sigma(P(t))_j$  represent the standard deviation of temporal series of wave power,  
 15  $P(t)$ , for year  $j$ , and  $P_{aj}$  is the respective annual average wave power. According to Cornett  
 16 (2008), small values of COVP mean that the wave resources are stable. For  
 17  $0.8 \leq COVP \leq 0.9$  the wave resources can be considered moderately instable. Therefore, for  
 18  $COVP > 0.9$  the resource is unstable.

### 19 **3.4 Statistical analysis**

20 The wave climate at a certain location is well characterized by the time-series of significant  
 21 wave height and the peak period, which are recorded every 3 hour (time interval necessary for  
 22 verifying significant change in wave spectrum). Using these parameters, other statistics such  
 23 as the average available power in waves can be calculated. To understand the time-series  
 24 behaviour of some important wave parameters, to calculate the confidence interval, the  
 25 smoothing curves, and the forecast of its values, some statistical tools of analysis are used. In

1 this context, some well known statistics software such as R software (Kuhnert and Venables,  
2 2005), gretl software (Cottrell and Lucchetti, 2008), XLSTAT (XLSTAT, 2015) and Minitab  
3 (Minitab, 2010) are used. Aspects such as the trend analysis, stationarity and normality tests  
4 of the average power are here analysed. To perform the forecast of the average power in  
5 waves, the Autoregressive Integrated Moving Average (ARIMA) model is used. Non-  
6 seasonal ARIMA model is generally represented as ARIMA (p,d,q) where, p is the order of  
7 the Autoregressive Model, d is the degree of differencing and q is the order of the Moving  
8 Average Model (Bisgaard and Kulahci, 2011).

9 Finally, the most common sea-states in Cape-Verde can be shown through the wave  
10 histogram. The wave histogram is a table that lists the occurrence of the sea-states in terms of  
11 significant wave height and peak period or mean up-crossing period. It is the long-term  
12 statistical representation of sea states. Using the information in the wave histogram it is  
13 possible to identify the most common sea states in a certain region.

### 14 **3.5 Representativeness of the monthly average output power from the NCs**

15 The energy that excites the NCs is a function of the local wave regime, while its output  
16 energy depends on the input energy (wave regime) and on the geometry of the NCs (Fig. 3).  
17 For each NC the geometry is fixed, hence the output energy is directly determined by the  
18 local wave regime. This means that the variation in the output energy content is caused by the  
19 variation in the input energy content, that is by the variation of the local wave regime. In this  
20 context, it is reasonable to assume that the minimum sampling size necessary for  
21 characterizing the input energy content is equal to the minimum sampling size needed to  
22 characterize the output energy from the NCs. The calculation of the minimum sampling size  
23 for characterizing the input energy into the cave is done using the Minitab Software. For three  
24 hours time interval between successive readings, the total number of data points acquired  
25 during one day is eight. So, if this minimum sampling size is represented by  $N_{in}$ , the  
26 correspondent minimum time duration for data acquisition to achieve the representativeness  
27 of the input power is  $N_{in}/8$  days. Therefore, to guarantee the representativeness of the output  
28 energy from the NCs the duration necessary to realize the experimental study on these natural  
29 infrastructure is equal to  $N_{in}/8$  days.

30

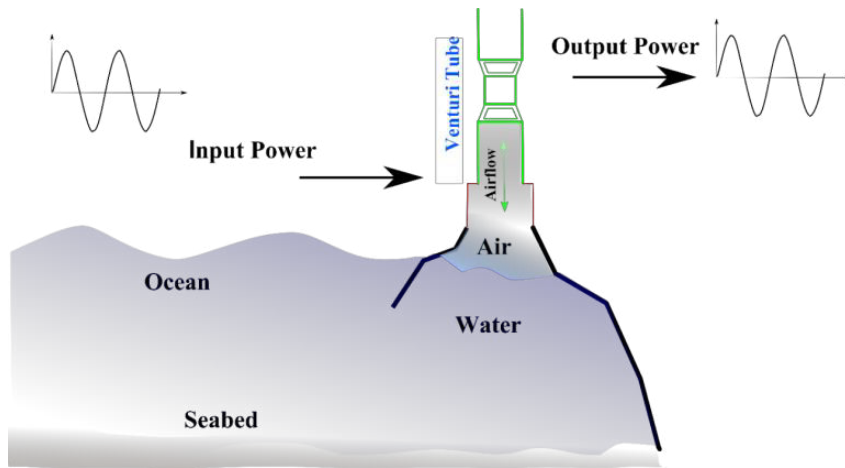

1  
2 Figure 3. Energy production system by NCs.

3

#### 4 **4 Results**

5 Table 2 shows the histogram of wave regime, where 78.03 % of the waves have significant  
6 wave height of 1-2 m and 20.81% of all occurrences feature peak period from 6-9 s and  
7 significant wave height from 1.5-2 m. The minimum and maximum values of significant  
8 wave height and peak period recorded are, respectively 0.59 m and 3.82 m and 2.85s and  
9 22.12 s. Yet, the histogram presented in Table 2 shows two local maxima for the peak period  
10 6 to 9s and 12 to 15s, for significant wave height between 1.5 and 2.5 m. This bimodal  
11 distribution indicates a superposition of two distinct wave regimes, the first with origin in a  
12 region of a shorter fetch (smaller period) and the second with origin in a region of longer  
13 fetch (longer period). Fig.4 shows the wave rose diagram obtained for these two wave  
14 regimes. The first diagram (A) represents the predominant direction for peak periods between  
15 6s and 9s. These waves are generated by the predominant winds, blowing constantly  
16 throughout the year, from NNE direction. Since there is not enough fetch length between  
17 Cape Verde Islands and the African continent (600 Km), the wave regime do not fully  
18 develop and remains with a peak period between 6 and 9 seconds.

19 The second diagram (B) represents the predominant direction for peak periods between 12s  
20 and 15s and shows a superposition of waves from two origins:

- 21 • NNW waves which are generated during early-year winter storms in the North-  
22 Atlantic

1 • SSW waves which are in turn generated during the end-year autumn storms in the  
 2 South-Atlantic.

3 Both regions have sufficient fetch length to fully develop the wave regime, and it may be  
 4 possible to observe outliers of 17s – 18s generated in South-Atlantic.

5 This is consistent with later findings in this paper that January and December are the most  
 6 energetic months and July is the least energetic month.

7

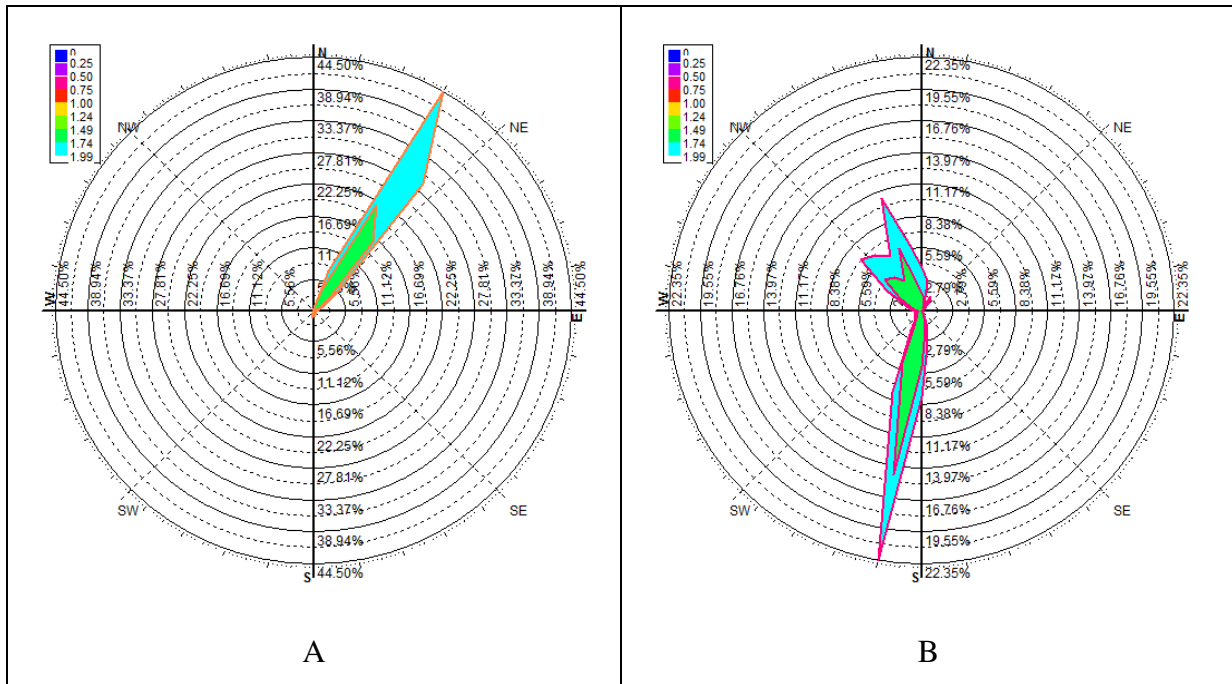

Figure 4. Wind rose for two local maxima characterized by the peaks periods between 6 and 9 s (A) and between 12 and 15 s (B).

8

9 Table 2. Histogram.

|             |       | Peak Period, $T_p$ [s] |     |     |      |       |       |       | Occurrence of $H_s$ | % Occurrence of $H_s$ |
|-------------|-------|------------------------|-----|-----|------|-------|-------|-------|---------------------|-----------------------|
|             |       | 1-3                    | 3-6 | 6-9 | 9-12 | 12-15 | 15-18 | 18-21 |                     |                       |
| Significant | 0-0.5 | 0                      | 0   | 0   | 0    | 0     | 0     | 0     | 0                   | 0.00                  |
|             | 0.5-1 | 1                      | 3   | 170 | 427  | 141   | 29    | 6     | 777                 | 0.86                  |

|                           |             |             |              |              |              |             |             |             |              |       |
|---------------------------|-------------|-------------|--------------|--------------|--------------|-------------|-------------|-------------|--------------|-------|
| 1-1.5                     | 0           | 572         | 8307         | 9194         | 7288         | 1742        | 127         | 4           | 27234        | 30.07 |
| 1.5-2                     | 0           | 730         | 18854        | 7590         | 12783        | 3315        | 171         | 2           | 43445        | 47.96 |
| 2-2.5                     | 0           | 20          | 8482         | 2072         | 3329         | 1355        | 85          | 0           | 15343        | 16.94 |
| 2.5-3                     | 0           | 0           | 1657         | 731          | 431          | 293         | 25          | 0           | 3137         | 3.46  |
| 3-3.5                     | 0           | 0           | 254          | 219          | 51           | 47          | 7           | 0           | 578          | 0.64  |
| 3.5-4                     | 0           | 0           | 28           | 29           | 3            | 8           | 1           | 0           | 69           | 0.08  |
| >4                        | 0           | 0           | 0            | 0            | 0            | 0           | 0           | 0           | 0            | 0.00  |
| <b>Occurrence of Tp</b>   | <b>1</b>    | <b>1325</b> | <b>37752</b> | <b>20262</b> | <b>24026</b> | <b>6789</b> | <b>422</b>  | <b>6</b>    | <b>90583</b> | 100   |
| <b>% Occurrence of Tp</b> | <b>0.00</b> | <b>1.46</b> | <b>41.68</b> | <b>22.37</b> | <b>26.52</b> | <b>7.49</b> | <b>0.47</b> | <b>0.01</b> | <b>100</b>   |       |

1

2 The curves on Fig. 5 show no clear trend on the time-series of the monthly average power,  
3 over the years. This fact is confirmed by the Mann-Kendal test (Mann, 1945) whose results  
4 are presented at Table 3. The Mann-Kendal test (at 5% level of significance) was done using  
5 commercially available software (XLSTAT, 2015). The results show that these monthly time-  
6 series can be considered trendless over the years, except for September and October with low  
7 p-values of 3.8% (September) and 1.8% (October). However, these trends should be the  
8 results of data aggregation error that will be reported in more detail later in this work.

9

10 Table 3. The Mann-Kendall Trend test for monthly average time-series.

| Months   | J             | F             | M             | A             | M             | J             | J             | A             | S          | O          | N             | D             |
|----------|---------------|---------------|---------------|---------------|---------------|---------------|---------------|---------------|------------|------------|---------------|---------------|
| p-values | 0.946         | 0.176         | 0.696         | 0.311         | 0.825         | 0.302         | 0.424         | 0.199         | 0.038      | 0.018      | 0.866         | 0.176         |
| Decision | Without Trend | Without Trend | Without Trend | Without Trend | Without Trend | Without Trend | Without Trend | Without Trend | With Trend | With Trend | Without Trend | Without Trend |

11

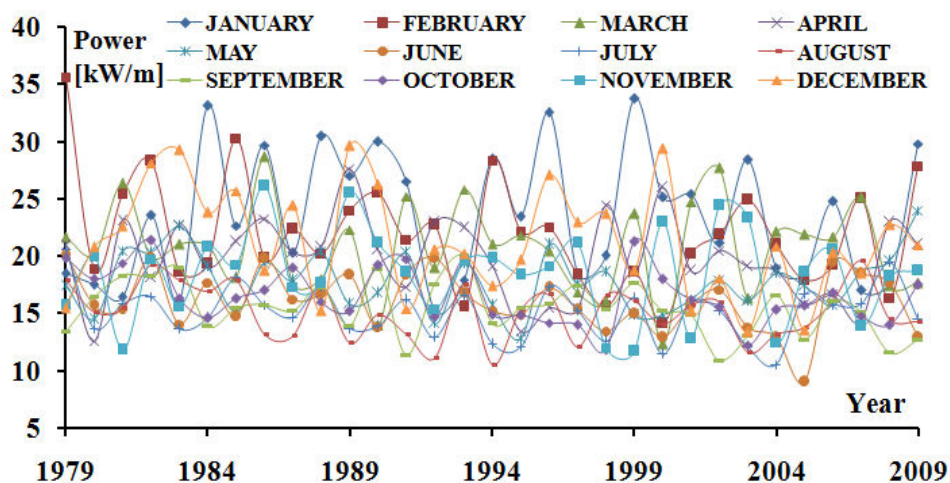

1  
2 Figure 5. Time-series of monthly average power.

3  
4 Fig. 6 shows the minimum, average and maximum power available on waves which has been  
5 calculated for each month of the 31 year long record. The graph clearly shows that the most  
6 energetic month is January (23.49 kW/m) and the least energetic month is July (15.04 kW/m).  
7 In fact, the average power decays from January to July and increases from July to December  
8 (21.21 kW/m). The curves presented in Fig.6 show the same behaviour as those obtained by  
9 Mackay et.al (2010), for a region off the north coast of Scotland.

10

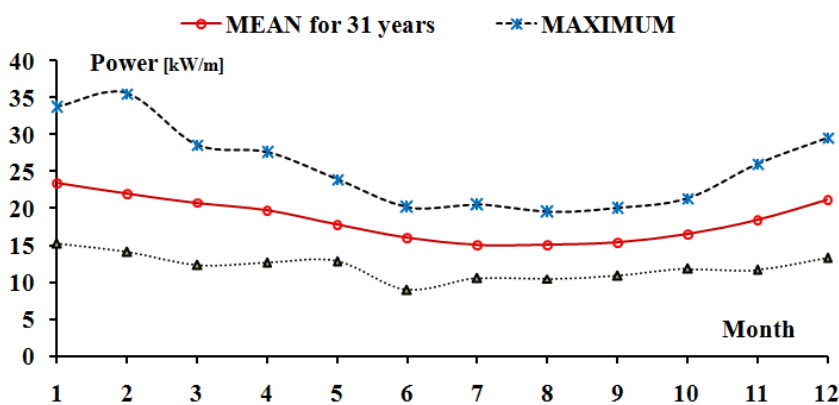

Figure 6. Statistics of monthly average power for 31 years of data.

11



1 Fig.7 shows the inter-annual average values of significant wave height (Hsav) and peak  
 2 period (Tpav), together with their moving average smoothing curves (MASC) of seven periods  
 3 7 (Hyndmann et al., 2008). According to this figure, the maximum and minimum inter-annual  
 4 average values of the significant wave height are equal to 1.83 m and 1.61 m, recorded,  
 5 respectively, in the years 1986/1997 and 2005. After 1990, the inter-annual average values of  
 6 the significant wave height shows a rapid decay until 1998, after which it shows a quasi-  
 7 constant behavior around 1.68 m, until 2009. The inter-annual average values of the peak  
 8 period has its maximum value of 11.00 s in 1997 and minimum of 9.91 s, in 2007. The values  
 9 of this parameter show a downward trend until 1994. Between 1994 and 2002 the inter-annual  
 10 values of the peak period have an upward trend and after 2002 it shows a quasi-constant  
 11 behaviour, around 10.5 s. Similar trend is observed for the significant wave height parameter.

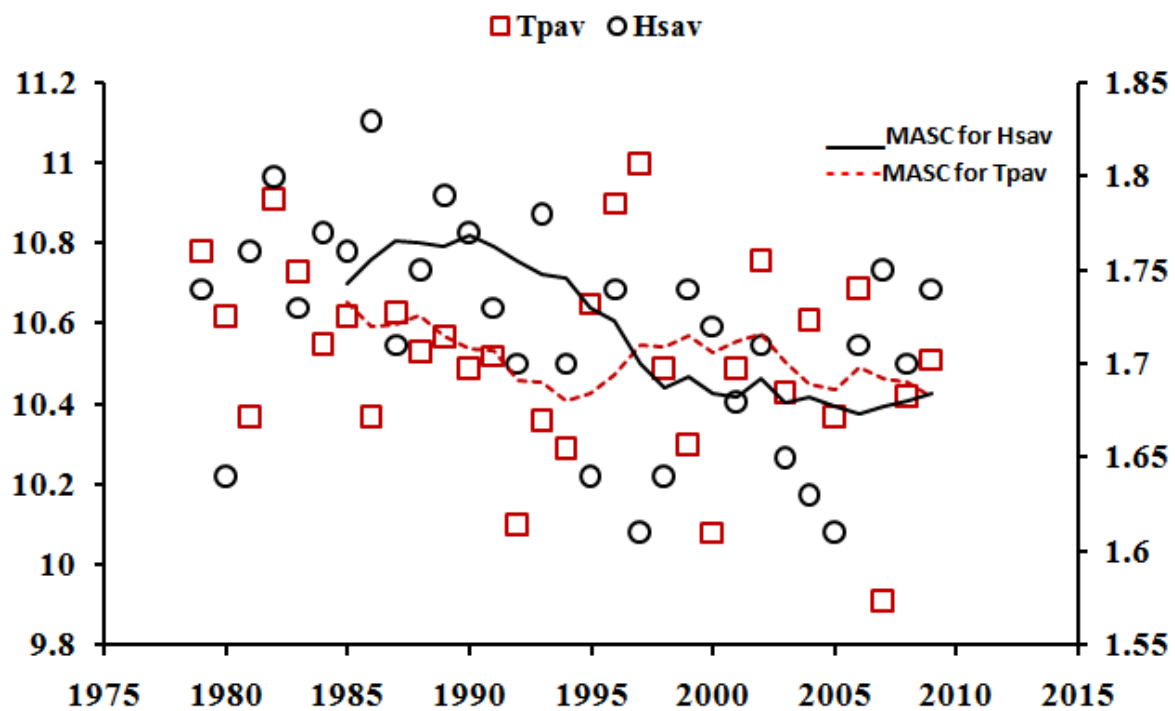

12

13 Figure 7. Inter-annual average values of significant wave height and peak period.

14

15 The inter-annual average values of power available in waves are shown in Fig.8. The  
 16 maximum and minimum values of this parameter are 21.04 kW/m and 15.94kW/m attained,  
 17 respectively, in 1982 and 2005. The inter-annual average values of power show a downward

1 trend until 1998, after which it exhibits a quasi-constant behavior around 18 kW/m, until  
2 2009.

3

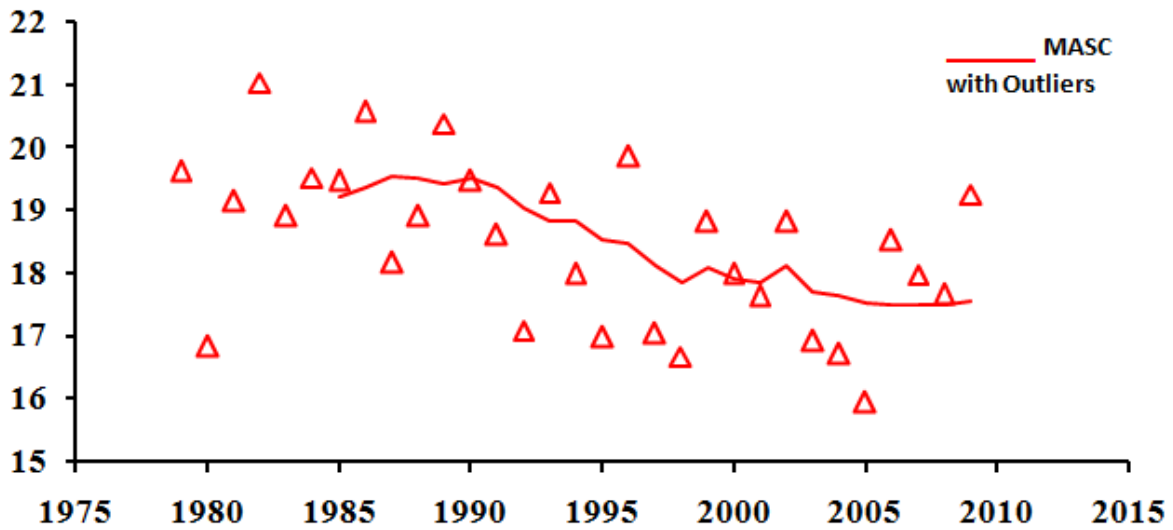

4

5 Figure 8. Time-Series of inter-annual average power.

6

7 For a more in depth analysis of the trend of the inter-annual average power time-series the  
8 Augmented Dikey-Fuller (ADF) trend test was used. As the Fig.8 shows, the time-series of  
9 the inter-annual average power shows an initial downward trend and a constant, as its values  
10 oscillate around a nonzero constant. Thus, in the ADF trend test we assume that there is a  
11 constant and a trend. Another aspect associated with the utilization of the ADF test is the  
12 calculation of the optimum Lag length. To do this, the calculation of the maximum Lag length  
13 ( $Lag_{max}$ ) is necessary. This can be done using the equation  $Lag_{max} = \text{int}\left\{12\left(T/100\right)^{1/4}\right\}$ ,  
14 suggested by Schwert (1989). In this equation, “int” means that we must accept the integer  
15 parts of the results produced by the equation and T is the dimension of sample. For our case  
16 study, T = 31 (for inter-annual time-series) observations and, therefore, the  $Lag_{max} = 9$ .  
17 Using the function “Var Lag” in gretl software, it is possible to calculate, automatically, the  
18 optimal Lag length, according to Akaike Information Criterion (AIC), Bayesian Information  
19 Criterion (BIC) and Hannan-Quinn Information Criterion (HQC) (Komm, 2015). The results  
20 produced by this procedure are presented in the following Table.

1 Table 4. The AIC, BIC and HQC values as a function of Lag length, for inter-annual average  
 2 power time-series.

| Lags | 1     | 2    | 3    | 4    | 5    | 6    | 7    | 8    | 9    |
|------|-------|------|------|------|------|------|------|------|------|
| AIC  | 3.23* | 3.27 | 3.29 | 3.33 | 3.42 | 3.48 | 3.41 | 3.50 | 3.49 |
| BIC  | 3.38* | 3.47 | 3.54 | 3.63 | 3.76 | 3.88 | 3.86 | 3.99 | 4.03 |
| HQC  | 3.27* | 3.32 | 3.35 | 3.40 | 3.50 | 3.57 | 3.51 | 3.62 | 3.62 |

3

4 In Table 4, “\*” means the best Lag length. Thus, the optimum Lag length is, then, Lag = 1,  
 5 according to all the criteria mentioned before. Using the gretl software for this optimal value  
 6 of the Lag length and the for the assumptions of existence of constant and trend, as mentioned  
 7 before, the ADF trend test produces a very low p – value = 0.0001, in comparison with the  
 8 level of significance ( $\alpha = 0.05$ ) used to perform the test. Therefore, the null hypotheses of  
 9 non-stationarity must be rejected. Thus, the time-series present a deterministic trend that is,  
 10 the inter-annual average time-series of power is a trend-stationary process (Stadnitski, 2009).  
 11 This kind of trends is caused by a moving average component that is an explicit function of  
 12 time. To better understand the nature of the trend, exhibit by the values of inter-annual  
 13 average power, it would be worth to carry on the trend test of the original time-series of  
 14 power. Fig.9 shows the original time-series of power, between 1979 and 2009 calculated for  
 15 each 3h. Analyzing this figure becomes clear that the values of the power oscillate around a  
 16 constant different from zero and there is no clear evidence of trend in the value of the referred  
 17 parameter.

18

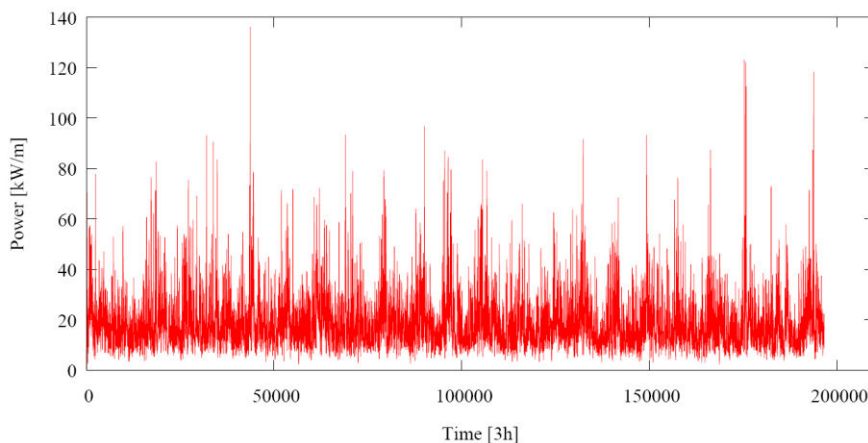

19

20 Figure 9. The original time-series of annual power, between 1979 and 2009.

1 The optimum Lag length is calculated and is equal to Lag = 21 (AIC), Lag = 7 BIC and  
 2 Lag = 9 (HQC). These different results for optimum Lag-length could be associated with the  
 3 heterogeneity of our data. The ADF test was carried out for all three Lag lengths and all of  
 4 them produced a rejection of null hypothesis of non-stationarity. So, the original time-series  
 5 of power is stationary around a constant mean. These results lead us to conclude that the  
 6 initial trend shown in the values of the inter-annual time-series of power could have been  
 7 caused by two factors: the effects of aggregation (Clark et al., 1976) and the existence of the  
 8 Outliers, defined as an observation in data set which appears to be inconsistent with  
 9 remainder of that set of data (Johnson, 1992). These outliers could affect significantly the  
 10 mean values of power. According to Clark et al. (1976), aggregation problem can be defined  
 11 as the information loss which occurs in the substitution of aggregate, or macro-level, data for  
 12 individual, or micro-level, data. This undesirable effect reduces the variability of data. In fact,  
 13 aggregating the values of the power into its inter-annual average values produce, in our case, a  
 14 reduction of standard deviation parameter from 10.39 kW/m, in original time-series, to 1.29  
 15 kW/m, in inter-annual time-series. This corresponding to a dramatic reduction of 87.5% of  
 16 standard deviation in comparison with the value of this quantity for the original time-series,  
 17 and it could introduce a high level of error associated with the aggregation effects.

18 To analyze the implications of the outliers in our results, they were identified, through the box  
 19 plot method (Ben-Gal, 2005), using, for the present study, the R software, and subsequently  
 20 removed from the time-series. The numbers of the outliers found, in this way, for each time-  
 21 series of the annual average power, are presented in Table 5.

22 Table 5. Numbers of outliers present in each annual time-series of power

| Year                       | 1979 | 1980 | 1981 | 1982 | 1983 | 1984 | 1985 | 1986 | 1987 | 1988 | 1989 | 1990 | 1991 | 1992 | 1993 | 1994 | 1995 | 1996 | 1997 | 1998 | 1999 | 2000 | 2001 | 2002 | 2003 | 2004 | 2005 | 2006 | 2007 | 2008 | 2009 |
|----------------------------|------|------|------|------|------|------|------|------|------|------|------|------|------|------|------|------|------|------|------|------|------|------|------|------|------|------|------|------|------|------|------|
| Number<br>s of<br>Outliers | 130  | 132  | 151  | 120  | 111  | 146  | 102  | 107  | 104  | 92   | 155  | 125  | 110  | 124  | 128  | 114  | 95   | 149  | 149  | 78   | 134  | 106  | 124  | 118  | 187  | 95   | 31   | 134  | 101  | 108  | 180  |

23  
 24 As we mentioned before, all outliers are removed from the time-series of annual average  
 25 power. Further, the time-series of the inter-annual average power is, then, calculated, and the  
 26 results are plotted in Fig.10, together with the correspondent inter-annual average power  
 27 including outliers. As the referred figure shows, the trend-stationarity process persists in the

1 time-series of the inter-annual average power even when removing the outliers. That is, the  
 2 trend is not caused by the influence of outliers. But, they introduce a slightly relative variation  
 3 in the values of inter-annual average power, which maximum varies between 1.85% and 13%.  
 4 However, at sites of extreme storms, severe outliers may appear. In this context, it is worth  
 5 analyzing the influence of these severe outliers in the context of wave energy resource  
 6 characterization. Now, it is clear that the trend of the inter-annual average power is a result of  
 7 the effect of data aggregation.

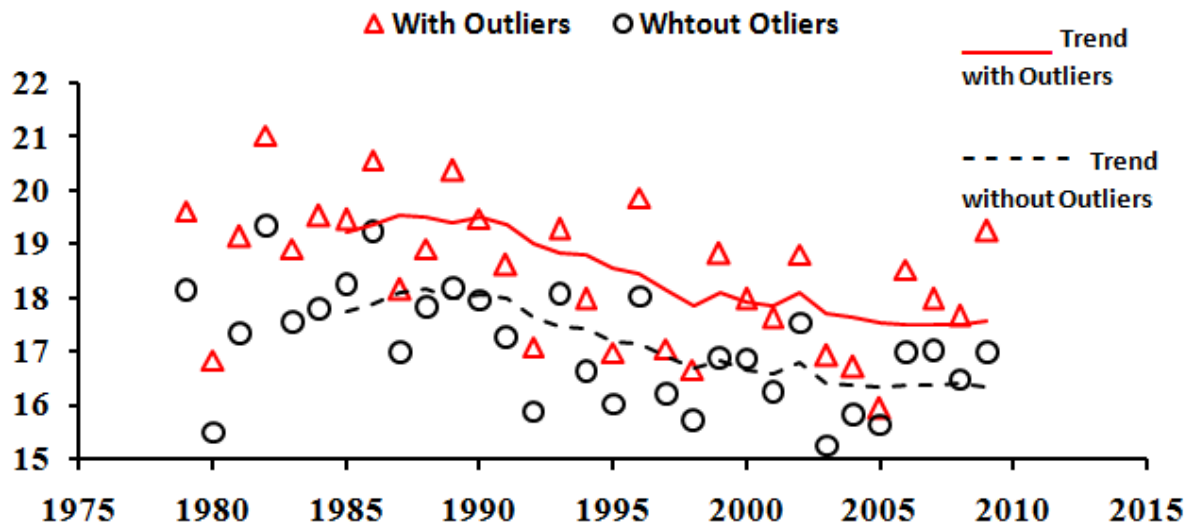

8  
 9 Figure 10. The time-series of inter-annual average power, with and without outliers.

10  
 11 To estimate the future behaviour of the values of the inter-annual average power a forecast for  
 12 the next 10 years is performed. For this purpose, it is necessary to calculate the best ARIMA  
 13 model.

14 According to the ADF trend test, the original time-series of the inter-annual average power is  
 15 trend-stationary. The first difference (P-1) is stationary as it is possible to see through the  
 16 values of the Autocorrelation Factor (ACF) and of Partial Autocorrelation Factor (PACF)  
 17 presented in Fig.11, generated by gretl software. In fact, as shown in Fig. 11, the values of  
 18 these parameters are statistically equal to zero, as they are less than 0.35, after Lag = 1 (for  
 19 ACF) and Lag = 2 (for PACF). ACF and PACF are two statistical measures that show how  
 20 the observations in a time-series are related to each other. Thus, to determine a proper model  
 21 for a given time-series, it is necessary to carry out the analysis of these parameters

1 (Frain,1999). In the present case, the original time-series is converted into stationary time-  
2 series after the first differencing ( $d = 1$ ).

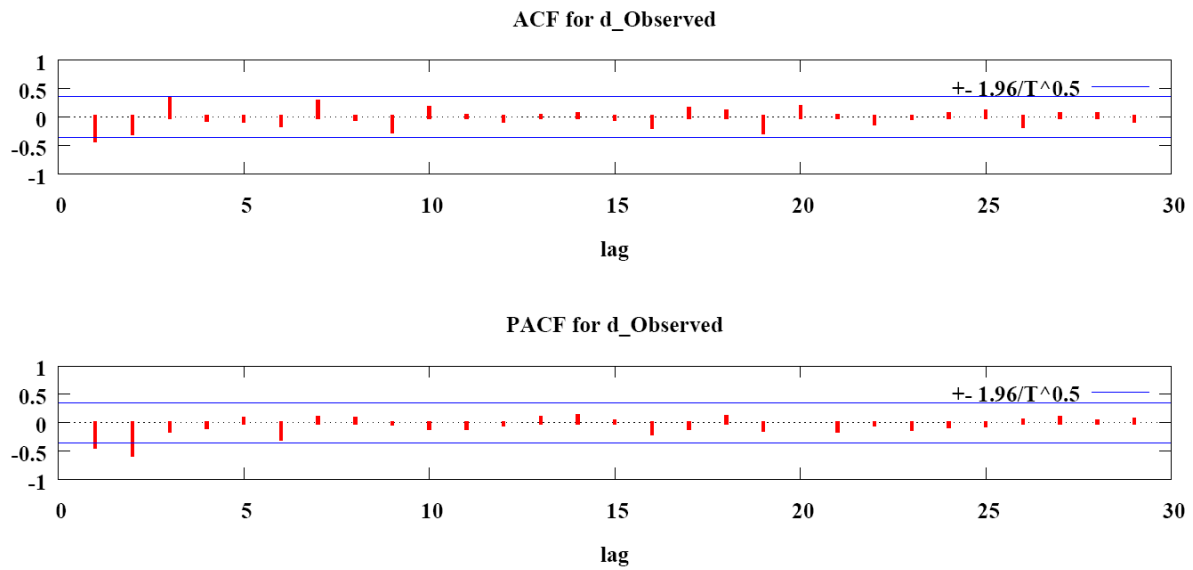

3  
4 Figure 11. The values of ACF and PACF parameters for the inter-annual average power time-  
5 seires.

6  
7 According to Hintze (2007) the value of  $p$  is determined from the PACF of the appropriate  
8 differenced time-series. If the PACF cuts off after a few Lags, the last Lag with a large value  
9 would be the estimate for  $p$ . Therefore,  $p$  is equal to 2 (Fig.11). The value of  $q$  is estimated,  
10 following the same procedure, using the values of the ACF parameter shown in Fig.11. So,  
11  $q=1$  and, the best ARIMA model to make the forecast is ARIMA (2, 1, 1). However, using  
12 the R software it is possible to generate automatically, the best ARIMA model to make a  
13 forecast of a time-series. For our inter-annual average power time-series the R software  
14 produce the ARIMA (2,1,0). According to AIC and HQC criteria the ARIMA model  
15 generated by R software is better than ARIMA (2,1,1). In fact, the ARIMA (2,1,0) led to the  
16 lower values of AIC (103.78) and HQC (105.57) in comparison to which presented by  
17 ARIMA (2,1,1) that were, respectively, 104.83 for AIC and 107.07 for HQC. Thus, in the  
18 present study, the forecast was made using the best ARIMA model, that is the ARIMA  
19 (2,1,0).

1 Fig.12 shows the results of the forecast for the inter-annual average power, achieved using the  
 2 gretl software. As Fig.12 shows, the predicted time-series follows the observed time-series  
 3 and produced a residual values that oscillate around zero (Fig.13), which shows that the  
 4 predicted values tend to adjust to the observed values. According to the forecast, the predicted  
 5 time-series of the inter-annual average power seems to oscillates, without any trend, around of  
 6 18 kW/m, as was previously predicted using the moving average smoothing curve. This  
 7 value is very close to the one calculated by Falnes. J. (2007), for tropical regions, similar to  
 8 Cape-Verde Island.

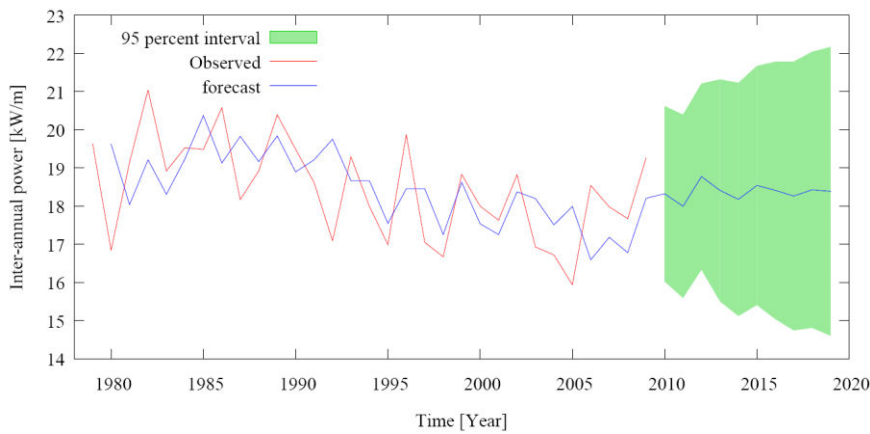

9

10 Figure12. Forecast of Annual Average Power (generated by R software).

11

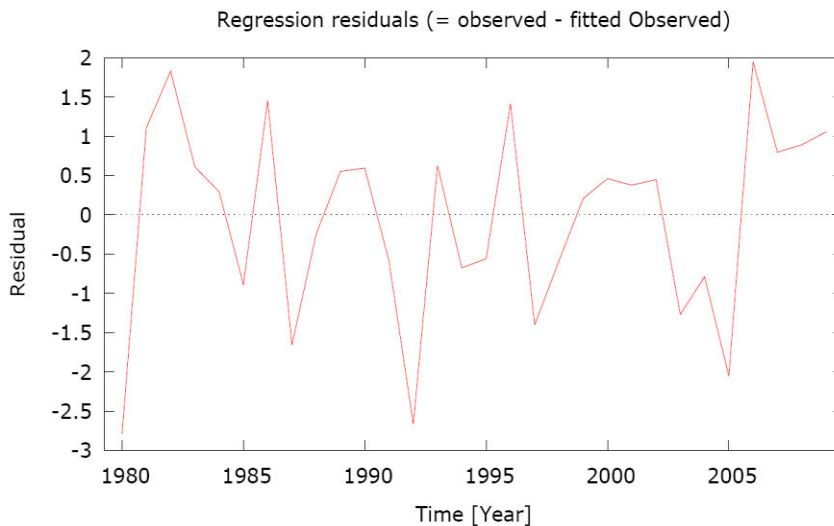

12

13 Figure13. Residual values of the Forecasted inter-annual Average Power time-series  
 14 (generated by R software).

1 The normality test of Anderson-Darling (Thode, 2002) shows that the inter-annual average  
 2 power follows a normal distribution with p-value equal to 51.5% (Fig. 14). As this p-value is  
 3 higher than the significance level of 5%, the hypothesis of the normality distribution is  
 4 accepted. Fig.14 was generated by Minitab software and represents a summary report of the  
 5 inter-annual average power time-series. It shows, with a significance level equal to 0.05, the  
 6 confidence intervals for the inter-annual mean (17.981 kW/m – 18.924 kW/m), for the inter-  
 7 annual median (17.879 kW/m – 19.186 kW/m) and for the inter-annual Standard Deviation  
 8 (1.028 kW/m – 1.719 kW/m). Fig. 15 shows the normal probability plot for the inter-annual  
 9 average power. As it is possible to note in this figure, in general, the data follow the normal  
 10 line. However, some deviation from this normal line is registered between 16.99 kW/m and  
 11 17.09 kW/m.

12

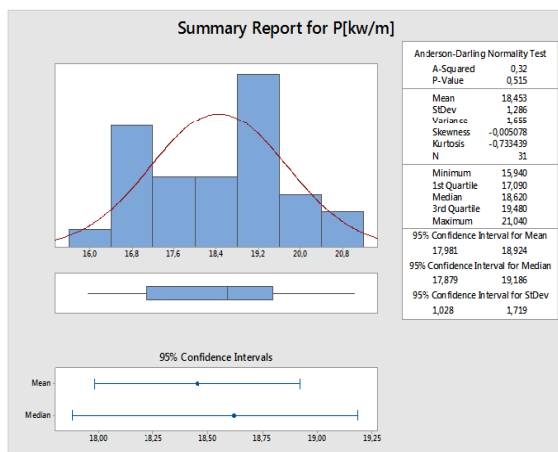

Figure 14. Summary report of inter-annual average power, between 1979 and 2009.

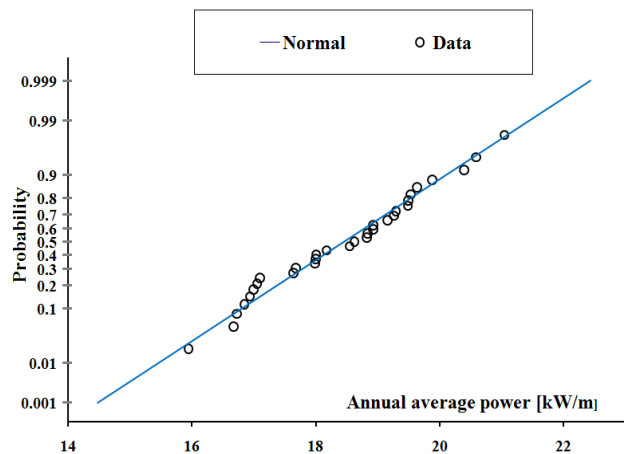

Figure 15. Normal probability plot.

13

14 The wave energy resources in Cape-Verde are stable with COVP less than 0.8, as it is  
 15 possible to see in Fig. 16-A, which represents the time-series of the inter-annual values of  
 16 COVP. The MVI parameter shows that the monthly wave energy resources can be considered  
 17 relatively stable with MVI values less than 1.2 (Fig. 16-B). This is a very attractive aspect  
 18 associated with the utilization of wave energy to produce electricity in Cape-Verde, since it  
 19 affects the useful life cycle of ocean wave conversion equipment.



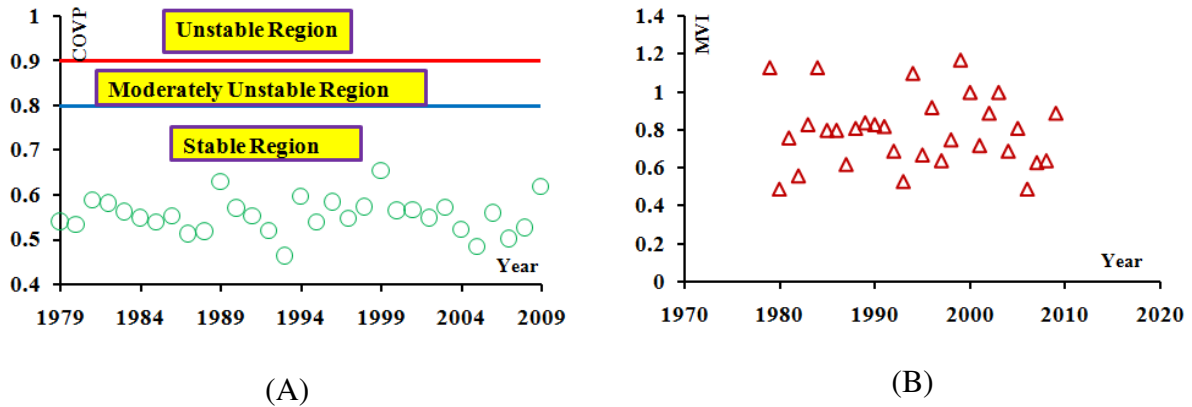

Figure 16. Temporal variability of wave resources. A – Coefficient of Variation of Power; B – Monthly Variation Index.

2 Defining a set of samples using all values of the significant wave height, peak period and the  
 3 average power obtained for each month during the 31 years of data, the confidence intervals  
 4 for all of these parameters were calculated, using the Minitab software and admitting a  
 5 significance level of 5%. Before defining the referred confidence intervals the normality tests  
 6 for all of these parameters were performed. Table 6 summarizes the statistical information  
 7 about the normality tests, average values and confidence intervals for each month. The values  
 8 of the A-squared parameter shows that the data is non-normal (D’Agostino,1986). According  
 9 to D’Agostino (1986), the critical value of the A-squared parameter, for a 95% confidence  
 10 level, is 0.752. The values of this parameter presented in Table 6 are higher than this critical  
 11 value. So, there is a very strong evidency that the data is non-normal. This result is confirmed  
 12 by the p-values that are, in all cases, lower than 0.05 (significance level) implying the  
 13 rejection of the normality hypothesis. The Minitab software has an option to calculate the  
 14 confidence intervals for non-normal data. The results are presented in Table 6.

15

16 Table 6.Monthly statistical reports.

| Variable | Simple size. N | Anderson-Darling Normality Test |                | Mean    | StDev   | SE Mean | 95% CI             |
|----------|----------------|---------------------------------|----------------|---------|---------|---------|--------------------|
| Hs[m]    | 7687           | A-Squared: 40.63                | p-value <0.005 | 1.92191 | 0.50899 | 0.00581 | (1.91053; 1.93329) |

|          |                     |       |                   |                |                                               |
|----------|---------------------|-------|-------------------|----------------|-----------------------------------------------|
|          | <b>TP[s]</b>        | 7687  | A-Squared: 170.24 | p-value <0.005 | 10.7142 3.1631 0.0361 (10.6435;<br>10.7849)   |
|          | <b>P<br/>[kW/m]</b> | 7687  | A-Squared: 202.38 | p-value <0.005 | 23.513 13.783 0.157 (23.205;<br>23.821)       |
|          | <b>Hs [m]</b>       | 7008  | A-Squared: 15.53  | p-value <0.005 | 1.87711 0.46451 0.00555 (1.86623;<br>1.88798) |
| <b>F</b> | <b>TP[s]</b>        | 7008  | A-Squared: 145.66 | p-value <0.005 | 10.4387 3.0192 0.0361<br>(10.3680;10.5094)    |
|          | <b>P<br/>[kW/m]</b> | 7008  | A-Squared: 208.03 | p-value <0.005 | 21.897 12.716 0.152 (21.599;<br>22.195)       |
|          | <b>Hs [m]</b>       | 7689  | A-Squared: 21.63  | p-value <0.005 | 1.80126 0.43902 0.00501 (1.79144;<br>1.81107) |
| <b>M</b> | <b>TP[s]</b>        | 7689  | A-Squared: 70.03  | p-value <0.005 | 10.8515 2.8814 0.0329 (10.7871;<br>10.9159)   |
|          | <b>P<br/>[kW/m]</b> | 7689  | A-Squared: 131.79 | p-value <0.005 | 20.780 10.801 0.123 (20.538;<br>21.021)       |
|          | <b>Hs[m]</b>        | 7440  | A-Squared: 36.30  | p-value <0.005 | 1.80543 0.38490 0.00446 (1.79668;<br>1.81417) |
| <b>A</b> | <b>TP[s]</b>        | 7440  | A-Squared: 118.55 | p-value <0.005 | 10.3233 2.7986 0.0324 (10.2597;<br>10.3869)   |
|          | <b>P[kW/m]</b>      | 7440  | A-Squared: 161.64 | p-value <0.005 | 19.763 9.983 0.116 (19.536;<br>19.990)        |
|          | <b>Hs[m]</b>        | 15376 | A-Squared: 29.32  | p-value <0.005 | 1.73386 0.31984 0.00258 (1.72881;<br>1.73892) |
| <b>M</b> | <b>TP [s]</b>       | 15376 | A-Squared: 491.92 | p-value <0.005 | 10.2287 3.0524 0.0246 (10.1804;<br>10.2769)   |
|          | <b>P[kW/m]</b>      | 15376 | A-Squared: 258.45 | p-value <0.005 | 17.8068 7.9966 0.0645 (17.6804;<br>17.9332)   |
|          | <b>Hs[m]</b>        | 14880 | A-Squared: 29.78  | p-value <0.005 | 1.64809 0.30307 0.00248 (1.64322;<br>1.65296) |
| <b>J</b> | <b>TP [s]</b>       | 14880 | A-Squared: 618.05 | p-value <0.005 | 10.1125 3.0069 0.0246 (10.0642;<br>10.1608)   |
|          | <b>P[kW/m]</b>      | 14880 | A-Squared: 291.89 | p-value <0.005 | 16.0597 7.4576 0.0611 (15.9399;<br>16.1795)   |
| <b>J</b> | <b>Hs[m]</b>        | 15376 | A-Squared: 46.52  | p-value <0.005 | 1.59065 0.26830 0.00216 (1.58640;             |

|          |                |       |                   |                |                                               |
|----------|----------------|-------|-------------------|----------------|-----------------------------------------------|
|          |                |       |                   |                | 1.59489)                                      |
|          | <b>TP [s]</b>  | 15376 | A-Squared: 849.41 | p-value <0.005 | 10.1592 2.8717 0.0232 (10.1138;<br>10.2046)   |
|          | <b>P[kW/m]</b> | 15376 | A-Squared: 254.08 | p-value <0.005 | 15.0375 6.6470 0.0536 (14.9324;<br>15.1425)   |
|          | <b>Hs[m]</b>   | 7688  | A-Squared: 27.43  | p-value <0.005 | 1.57631 0.26316 0.00300 (1.57043;<br>1.58219) |
| <b>A</b> | <b>TP[s]</b>   | 7688  | A-Squared: 337.55 | p-value <0.005 | 10.2906 2.9649 0.0338 (10.2243;<br>10.3569)   |
|          | <b>P[kW/m]</b> | 7688  | A-Squared: 174.44 | p-value <0.005 | 15.1119 7.2471 0.0827 (14.9499;<br>15.2740)   |
|          | <b>Hs[m]</b>   | 7440  | A-Squared: 13.53  | p-value <0.005 | 1.59887 0.27965 0.00324 (1.59251;<br>1.60522) |
| <b>S</b> | <b>TP[s]</b>   | 7440  | A-Squared: 204.76 | p-value <0.005 | 10.2960 2.8409 0.0329 (10.2315;<br>10.3606)   |
|          | <b>P[kW/m]</b> | 7440  | A-Squared: 143.42 | p-value <0.005 | 15.4316 7.0104 0.0813 (15.2723;<br>15.5910)   |
|          | <b>Hs[m]</b>   | 7687  | A-Squared: 24.60  | p-value <0.005 | 1.60069 0.33400 0.00381 (1.59322;<br>1.60816) |
| <b>O</b> | <b>TP[s]</b>   | 7687  | A-Squared: 61.21  | p-value <0.005 | 10.8908 2.8969 0.0330 (10.8261;<br>10.9556)   |
|          | <b>P[kW/m]</b> | 7687  | A-Squared: 188.74 | p-value <0.005 | 16.5502 8.6290 0.0984 (16.3573;<br>16.7431)   |
|          | <b>Hs[m]</b>   | 7440  | A-Squared: 45.13  | p-value <0.005 | 1.65678 0.39347 0.00456 (1.64784;<br>1.66573) |
| <b>Z</b> | <b>TP[s]</b>   | 7440  | A-Squared: 47.37  | p-value <0.005 | 11.0808 2.9679 0.0344 (11.0133;<br>11.1482)   |
|          | <b>P[kW/m]</b> | 7440  | A-Squared: 212.76 | p-value <0.005 | 18.439 11.008 0.128 ( 18.189;<br>18.689)      |
|          | <b>Hs[m]</b>   | 7688  | A-Squared: 65.15  | p-value <0.005 | 1.80871 0.45569 0.00520 (1.79852;<br>1.81890) |
| <b>D</b> | <b>TP[s]</b>   | 7688  | A-Squared: 110.55 | p-value <0.005 | 10.7810 3.1661 0.0361 (10.7102;<br>10.8518)   |
|          | <b>P[kW/m]</b> | 7688  | A-Squared: 298.54 | p-value <0.005 | 21.213 13.252 0.151 ( 20.917;<br>21.509)      |

1 The energy from NCs is a time-varying quantity. Thus, to estimate this parameter it is  
2 necessary to achieve the minimum sampling dimension to guarantee its temporal  
3 representativeness. As the wave regime is the only parameter that causes the variation in the  
4 energy content produced by NCs, we assume that the minimum sampling size necessary to  
5 characterize the monthly average power on waves is equal to the minimum sampling size to  
6 characterize the monthly average power emanating from the NC. Further, this minimum  
7 sampling dimension is converted in numbers of days for monitoring the NCs in order to  
8 achieve the temporal representativeness of the power data. In this way, using the Minitab  
9 software, the minimum number of sample points, for average monthly power, was calculated  
10 admitting a 0.85 power factor, a significance level equal to 0.05 and a value of 3kW/m for  
11 margin of error. This margin of error was assumed taking into account the possibility to  
12 completing all measurements in one year. In this context, lower margin of error implies higher  
13 number of sample points. Table 7 show the standard deviations, the minimum sampling size  
14 to guarantee the representativeness of the values of the monthly average power and,  
15 consequently, the number of days to carry out the experiments on the Natural Caves in order  
16 to ensure the correct values of the average power extracted from these natural infrastructures.  
17 It is important to note that during the spring (March to May) and summer (June to August) the  
18 minimum numbers of days of measurements are lowers in comparison with the rest of the  
19 months. The reason for this finding is associated with the nature of the wave data for the  
20 referred months. That is, during the spring and summer the wave data present low dispersion  
21 as it is possible to see through the values of the standard deviation in Table 7, indicating that  
22 the wave energy resources are most stable during these periods of the year. Therefore, the  
23 minimum sample size for characterizing these wave data is lower than the rest of the months  
24 for which the standard deviations are higher.

25

26 Table 7. Minimum sampling size and the corresponding numbers of days of measurements

| <b>Power Factor: 0.85; Margin of Error: 3 kW/m; Significance level: <math>\alpha = 0.05</math></b> |                                                |                                 |                                            |
|----------------------------------------------------------------------------------------------------|------------------------------------------------|---------------------------------|--------------------------------------------|
| <b>Months</b>                                                                                      | <b>Standard deviation, <math>\sigma</math></b> | <b>Minimum sampling size, n</b> | <b>Numbers of days (for 3 h time step)</b> |
| <b>J</b>                                                                                           | 13.25                                          | 178                             | 23                                         |
| <b>F</b>                                                                                           | 11.01                                          | 123                             | 16                                         |
| <b>M</b>                                                                                           | 8.63                                           | 77                              | 10                                         |

|          |       |     |    |
|----------|-------|-----|----|
| <b>A</b> | 7.01  | 51  | 7  |
| <b>M</b> | 7.25  | 55  | 7  |
| <b>J</b> | 6.65  | 47  | 6  |
| <b>J</b> | 7.46  | 58  | 8  |
| <b>A</b> | 7.99  | 66  | 9  |
| <b>S</b> | 9.98  | 102 | 13 |
| <b>O</b> | 10.80 | 119 | 15 |
| <b>N</b> | 12.78 | 165 | 21 |
| <b>D</b> | 13.78 | 192 | 24 |

---

1

## 2 **5 Conclusion**

3 The most common sea state in Cape-Verde occurs 20.81% of time, featuring peak periods  
4 from 6-9 s and significant wave height from 1.5-2 m. For period between 1979 and 2009,  
5 78.03% of the waves present wave height between 1 and 2 m.

6 January and December are the most energetic months and July is the least energetic month.

7 The monthly wave power decreases from January to July and increases again to December.

8 Through the Coefficient of Variation of Power (COVP) it is possible to conclude that the  
9 wave resource is stable, with COVP between 0.46 and 0.66.

10 The MVI parameter shows that the wave resource can be considered relatively stable (MVI  
11 <1.2) from monthly average power point of view.

12 The monthly average and the annual time-series are stationeries over time. The confidence  
13 intervals for all months were calculated using the Minitab software.

14 The time-series of inter-annual average wave power shows some attenuation over the years,  
15 due to the occurrence of effect of aggregation. However, using the smoothing moving average  
16 curve it is possible to verify that, from 1999, inter-annual average wave power oscillate  
17 around of 18 kW/m.

18 This trend is confirmed by the analysis of 10 years of the inter-annual average power future  
19 values, using an appropriate ARIMA model generated automatically by R software.

1 The outliers, present in time-series of annual average power were identified and their  
2 influence in the value of inter-annual average power was quantified. Removing outliers from  
3 the annual time-series of power caused a maximum relative attenuation in the values of the  
4 inter-annual average power between 1.85 and 13%.

5 The minimum recording time of physical parameters associated with the NC operation are  
6 determined, for each month, under the assumption that the minimum sampling size necessary  
7 to characterize the monthly average power on waves is equal to the minimum sampling size to  
8 characterize the monthly average power emanating from the NC. In this context and for the  
9 Cape-Verde Wave Regime, the minimum sampling size and the corresponding numbers of  
10 days of measurements are given in Table 7. During the spring and summer the wave resources  
11 are more stable than the rest of the year and, therefore, the minimum numbers of day for  
12 monitoring the NCs are lower, in comparison with the rest of period of time.

13

#### 14 **Acknowledgements**

15 We are grateful to Jackson Augusto Léger Monteiro for his important contribution to the  
16 realization of this work.

17

#### 18 **References**

19 ABP Marine Environmental Research Ltd.: Technical Report, Report No. R1106 prepared for  
20 the UK Department of Trade and Industry, 2004.

21 Adinsoft, XLSTAT – Data Analysis and Statistical Application for Microsoft Excel, Adinsoft,  
22 New York, 2007.

23 Ben-Gal, I.: Outliers Detection, in Maimon O. and Rockach L. Eds, Data Mining and  
24 Knowledge Discovery Handbook: a complete guide for practitioners and researchers,  
25 Department of Industrial Engineering, Kluwer Academic Publisher, Tel-Aviv University,  
26 Israel, 2005.

27 Bisgaard, S. and Kulahci, M.: Time-series Analysis and Forecasting by Example. John Wiley  
28 & Sons, Hoboken, New Jersey, 2011.

- 1 Boyle, G.: Renewable Energy: Power for a Sustainable Future. Oxford University Press,  
2 United Kingdom, 2004.
- 3 Carvalho, J.M.C.: Elaboration of Third International Conference on Sustainable Development  
4 in Small Island States in Development, United Nations Development Programme, National  
5 Report, Republic of Cape-Verde, 2013.
- 6 Clark, W.A.V. and Avery, K.L.: The Effects of data Aggregation in Statistical Analysis,  
7 Geographical Analysis, Vol.8, Issue 4, 1976.
- 8 Cornett, A.M.: A Global Wave Energy Resources Assessment. Proc. International Journal of  
9 Offshore and Polar Engineering, Canada, 2008.
- 10 D'Agostino, R.B.: Test for Normal Distribution, Goodness-of-Fit Techniques. D'Agostino,  
11 R.B. and Stephens, M.A., editors, New York, Marcel Dekker, ISBN 0-8247-7487-6.
- 12 Dean, R. G. and Dalrymple, R. A.: Water Waves Mechanics for Engineers and Scientists.  
13 World Scientific Pub. Co., Teaneck, NJ, 1991.
- 14 DGE-Direcção Geral de Energia: Plano Energético de Cabo-Verde, Governo de Cabo-Verde,  
15 2009.
- 16 Electra: Relatório de Contas 2012. Electra-Empresa de Electricidade e Água, Cabo-Verde,  
17 2012.<http://www.electra.cv/index.php/2014-05-20-15-47-04/relatorios-sarl>.
- 18 EMEC. : Wave Developers. <http://www.emec.org.uk/marine-energy/wave-developers>, 2014.
- 19 Falnes, J.: A Review of Wave-Energy Extraction. Marine Structures 20, 2007.
- 20 GESTO: Plano Energético Renovável Cabo-Verde. Gesto-Energy Solutions, Algés, Portugal,  
21 2011.
- 22 Hagerman, G.: Southern New England Wave Energy Resource Potential. Proc. Building  
23 Energy'2001, Boston, USA, 2001.
- 24 Hintze, J.L.: NCSS User's Guide IV, Kaysville, Utah 84037, 2007.
- 25 Hyndmann, R. J., Koehler, A.B., Ord, J.K. and Snyder, R.D.: Forecasting With Exponential  
26 Smoothing, Springer-Verlag, Berlin, Heidelberg, 2008.
- 27 Johnson, R.: Applied Multivariate Statistical Analysis, Prentice Hall, 1992.

- 1 JRC.JRC Ocean Energy Database, 2014.
- 2 Kirchgassner, G. and Wolters, J.: Introduction to Modern Time-series Analysis, Springer-  
3 Verlag, Berlin, Heidelberg, 2008.
- 4 Komen, G. J., Cavaleri, I., Donelan, M., Hasselmann, K., Hasselmann, S. and Janssen,  
5 P.A.E.M.: Dynamics and modelling of ocean waves, Cambridge University Press, Cambridge,  
6 1994.
- 7 Komm, H.: Forecasting High-Frequency Volatility Shocks : An Analytical Real-time  
8 Monitoring System, Springer Gabler, Catholic University Eichstatt-Ingolstadt, Germany,  
9 2015.
- 10 Mackay, E.B.L., Bahaj, A.S. and Challenor, P.G.: Uncertainty in wave energy resource  
11 assessment. Part 2: Variability and predictability, Renewable Energy, 35, 2010.
- 12 Magagna, D.: Oscillating Water Column Wave Pump: A Wave Energy Converter for Water  
13 Delivery. Doctoral Thesis, Faculty of Engineering and the Environment, University of  
14 Southampton, England, 2011.
- 15 Mann, H.B.: Nonparametric Tests against Trend, *Econometrica*, Vol.13, No.3 1945.
- 16 Minitab, Minitab 17 Statistical Software. Minitab Inc., State College, Pennsylvania, USA,  
17 2010.
- 18 Mendes, A. C. And Monteiro, W.L.: Performance Analysis of a model of OWC energy  
19 converter in non-linear waves. Proc. 7<sup>th</sup> European Wave and Tidal Energy Conference,  
20 Portugal, 2007.
- 21 Monfor, L., Goldsmith, J. And Jones, F.: Ocean Energy Technology Readiness, Patent,  
22 Development Status and Outlook. International Renewable Energy Agency (IRENA), Abu  
23 Dhabi, 2014.
- 24 Monteiro, W.M.L. and Sarmiento, A.J.N.A.: Using the Natural Caves for Wave Energy  
25 Extraction: Modelling the Airflow through its Superficial Cavities using a Bidirectional  
26 Venturi Tube. Proc. EWTEC'2015, Nantes, 2015.
- 27 Mora-Figueroa, V.O., Olivares, C.H., Holmes, B. and O'Hagan, A.M.: Sowfia – Streamlining  
28 of Ocean Wave Farms Impact Assessment, Catalogue of Wave Energy Test Centres,  
29 IEE/09/809/SI2.558291, March, 2011.



- 1 NOAA, National Oceanic and Atmospheric Administration, National Centers for  
2 Environmental Information, 2015 website: <http://maps.ngdc.noaa.gov/viewers/bathymetry/>
- 3 Ponce de León, S., Silva, A.L. and Guedes Soares, C.: Reconstituição das Condições de  
4 Agitação Marítima no Arquipélago de Cabo-Verde, IV Congresso sobre Planeamento e  
5 Gestão de Zonas Costeiras dos Países de Expressão Portuguesa, Portugal, 2010
- 6 Schwert, G.W.: Tests for Unit Roots: A Monte Carlo Investigation, Journal of Business and  
7 Economic Statistics, 7, 1989.
- 8 Selenec.: Rapport Annuel 2015, Selenec – Société Nationale d'Électricité du Sénégal, Senegal,  
9 2015.
- 10 Scottish Renewable: Marine Milestones Report. Scottish Renewables, Glasgow, 2014.
- 11 Stadnitski, T.: Deterministic or Stochastic Trend: Decision on the Basis of the Augmented  
12 Dickey-Fuller Test, Methodology European Journal of Research Methods for the Behavioral  
13 and Social Sciences 6 (2), 2009.
- 14 Thode Jr, H.C.: Testing for Normality, State University of New York, Marcel Dekker, New  
15 York, 2002.
- 16 Tolman, H.L.: User manual and system documentation of Wave Watch-III version 1.18,  
17 OMB Technical Note 166, N.O.A.A, National Centre for Environmental Prediction, MD,  
18 USA, 1999.
- 19 XLSTAT, 2015 website: <https://www.xlstat.com/en/>
